# Supplementary material
Source: PubMed Central journal article supplement (PMC6583005)
Supplement: jama-320-1444-s002.pdf [file jama-320-1444-s002.pdf]

## Supplementary Online Content

Cahill AG, Srinivas SK, Tita ATN, et al. Effect of Immediate vs Delayed Pushing on Rates of Spontaneous Vaginal Delivery Among Nulliparous Women Receiving Neuraxial Analgesia: A Randomized Clinical Trial. *JAMA*. doi:10.1001/jama.2018.13986

**eMethods.** Definitions of outcome measures

**eTable 1.** Indications for operative deliveries

**eTable 2.** Participants' satisfaction with birthing experience in second stage based on a modified Mackey Childbirth Satisfaction Rating Scale

**eTable 3.** Primary and secondary efficacy outcomes (per protocol)

**eTable 4.** Primary and secondary efficacy outcomes (as treated)

This supplementary material has been provided by the authors to give readers additional information about their work.

## eMethods. Definitions of outcome measures

| Outcome Measure                                 | Definition                                                                                                                                                                                                                                                                                                                                          |
|-------------------------------------------------|-----------------------------------------------------------------------------------------------------------------------------------------------------------------------------------------------------------------------------------------------------------------------------------------------------------------------------------------------------|
| 1.Spontaneous vaginal delivery                  | Delivery that occurs without the use of forceps, vacuum, or cesarean                                                                                                                                                                                                                                                                                |
| 2.Operative vaginal delivery                    | Delivery that occurs with the use of forceps or vacuum                                                                                                                                                                                                                                                                                              |
| 3.Duration of second stage                      | Time interval from complete cervical dilation to delivery                                                                                                                                                                                                                                                                                           |
| 4.Duration of active pushing                    | Time interval from initiation of maternal pushing to delivery                                                                                                                                                                                                                                                                                       |
| 5.Postpartum hemorrhage                         | Estimated blood loss>500ml after vaginal delivery of 1000ml after cesarean                                                                                                                                                                                                                                                                          |
| 6.Severe postpartum hemorrhage                  | Estimated blood loss >1000ml for vaginal delivery and >2000ml for cesarean                                                                                                                                                                                                                                                                          |
| 7.Chorioamnionitis in the second stage of labor | Chorioamnionitis diagnosed by the treating physician after complete dilation (after trial entry)                                                                                                                                                                                                                                                    |
| 8.Endometritis                                  | Endometritis clinically diagnosed by the treating obstetrics provider anytime from delivery until 6 weeks postpartum. Clinical diagnosis, guided by: i) maternal fever (temperature >38.0°C on two occasions, 4 hours apart or >39.0°C on one occasion) >12 hours after delivery, ii) uterine tenderness, and iii) no evidence of another infection |
| 9.Second degree perineal laceration             | Laceration of the vaginal mucosa and/or perineal skin and deeper subcutaneous tissue                                                                                                                                                                                                                                                                |
| 10.Third degree perineal laceration             | Laceration of the vaginal mucosa and/or perineal skin and deeper subcutaneous tissue, with partial or complete laceration of the anal sphincter muscle                                                                                                                                                                                              |
| 11.Fourth degree perineal laceration            | Laceration of the vaginal mucosa and/or perineal skin, deeper subcutaneous tissue, complete laceration of the anal sphincter muscle, with laceration of the rectal mucosa                                                                                                                                                                           |

|                                                     |                                                                                                                                                                                                                                                                                                     |
|-----------------------------------------------------|-----------------------------------------------------------------------------------------------------------------------------------------------------------------------------------------------------------------------------------------------------------------------------------------------------|
| 12. Neonatal death                                  | Neonatal death prior to discharge                                                                                                                                                                                                                                                                   |
| 13. Major birth injury                              | Serious neonatal injury including skull fracture, brachial plexus injury, cephalohematoma                                                                                                                                                                                                           |
| 14. Neonatal acidemia                               | Umbilical cord arterial pH <7.10                                                                                                                                                                                                                                                                    |
| 15. Respiratory distress                            | Nasal flaring, subcostal and intercostal retractions, and need for supplemental oxygen to maintain oxygen saturations > 95%                                                                                                                                                                         |
| 16. Transient tachypnea                             | Respiratory rate >60/min with or without supplementary oxygen to maintain oxygen saturation > 95%                                                                                                                                                                                                   |
| 17. Meconium aspiration with pulmonary hypertension | Respiratory distress and transthoracic echocardiographic findings of main pulmonary artery pressures (right-left shunting across the patent ductus arteriosus and atria, a flattened septum, and a tricuspid regurgitation jet)                                                                     |
| 18. Hypoxic-ischemic encephalopathy                 | One or more of: umbilical artery arterial pH < 7.0, base deficit > -16, need for respiratory support at 10 minutes of life, 5-minute Apgar score < 5 – <i>and</i> – Moderate-severe neonatal encephalopathy <i>or</i> seizure activity                                                              |
| 19. Neonatal hypoglycemia                           | Neonatal venous blood glucose < 40mg/dL                                                                                                                                                                                                                                                             |
| 20. Suspected neonatal sepsis                       | Symptomatic neonate, defined as one or more of: respiratory distress, temperature instability, apnea, lethargy – <i>with or without</i> –<br>Abnormal complete blood count (6-12 hours after birth, with leukopenia or leukocytosis with an I:T ratio of >0.2) <i>and/or</i> positive blood culture |
| 21. Neonatal intensive care unit admission          | Admission to the neonatal intensive care unit >12 hours for any reason prior to hospital discharge                                                                                                                                                                                                  |
| 22. Maternal death                                  | Any maternal death                                                                                                                                                                                                                                                                                  |
| 23. Life-threatening maternal event                 | Life threatening events in the mother are defined as those that in the view of the investigators put the individual patient at imminent substantial risk of                                                                                                                                         |

|                                                   |                                                                                                                                                                                                        |
|---------------------------------------------------|--------------------------------------------------------------------------------------------------------------------------------------------------------------------------------------------------------|
|                                                   | dying, or if continued participation in the study might have resulted in death                                                                                                                         |
| 24. Maternal admission to the intensive care unit | Maternal admission to the intensive care unit for any indication                                                                                                                                       |
| 25. Unplanned hysterectomy                        | Unplanned hysterectomy performed during cesarean or following a vaginal delivery                                                                                                                       |
| 26. Neonatal death                                | Neonatal death prior to discharge                                                                                                                                                                      |
| 27. Life-threatening neonatal event               | Any life-threatening neonatal event, defined as those that in the view of the research staff and PI put the individual patient at imminent substantial risk of dying, within the first 24 hrs. of life |

**eTable 1.** Indications for operative deliveries

| Indications                       | Immediate pushing | Delayed pushing | P    |
|-----------------------------------|-------------------|-----------------|------|
| Operative vaginal delivery, n (%) | N=76              | N=71            | 0.37 |
| Non-reassuring fetal status       | 43 (56.6)         | 36 (50.7)       |      |
| Other/Unknown/Mixed               | 19 (25.0)         | 19 (26.8)       |      |
| Maternal exhaustion               | 8 (10.5)          | 10 (14.1)       |      |
| Inadequate expulsive efforts      | 3 (4.0)           | 6 (8.5)         |      |
| Arrest of Descent                 | 3 (4.0)           | 0               |      |
| Elective                          | 0                 | 0               |      |
| Cesarean delivery, n (%)          | N=93              | N=91            | 0.71 |
| Arrest of Descent                 | 57 (61.3)         | 46 (50.6)       |      |
| Other/Unknown/Mixed               | 28 (30.1)         | 34 (37.4)       |      |
| Non-reassuring fetal status       | 6 (6.5)           | 7 (7.7)         |      |
| Inadequate expulsive efforts      | 1 (1.1)           | 2 (2.2)         |      |
| Failed VAVD/FAVD                  | 1 (1.1)           | 1 (1.1)         |      |
| Maternal exhaustion               | 0                 | 1 (1.1)         |      |

The denominator of % is sum of deliveries

**eTable 2.** Participants' satisfaction with birthing experience in second stage based on a modified Mackey Childbirth Satisfaction Rating Scale

|                                                                                    | Immediate pushing<br>(n=1200 ) | Delayed pushing<br>(n=1204) | Mean Difference/<br>Relative Risk<br>(95% CI) | P    |
|------------------------------------------------------------------------------------|--------------------------------|-----------------------------|-----------------------------------------------|------|
| Overall satisfaction with experience in second stage, median (IQR)                 | 5(4, 5)                        | 5(4, 5)                     | 0.01 (-0.04, 0.06)                            | 0.67 |
| Comfort in second stage (1- 5 scale), median (IQR)                                 | 4(4, 5)                        | 4(4, 5)                     | 0.03 (-0.02, 0.09)                            | 0.22 |
| Control in second stage (1- 5 scale), median (IQR)                                 | 5(4, 5)                        | 5(4, 5)                     | 0.01 (-0.03, 0.05)                            | 0.63 |
| Satisfaction with baby's physical condition at birth(1- 5 scale), median (IQR)     | 5(5, 5)                        | 5(5, 5)                     | 0.03 (0.004, 0.06)                            | 0.03 |
| Satisfaction with physical care in second, median (IQR)                            | 5(5, 5)                        | 5(5, 5)                     | 0.003 (-0.02, 0.02)                           | 0.82 |
| Birth experience meeting expectation(1- 4 scale), median (IQR)                     | 3(2, 3)                        | 3(2, 4)                     | -0.01 (-0.12, 0.10)                           | 0.87 |
| Total second stage satisfaction score, median (IQR)                                | 26(24, 28)                     | 26(23, 28)                  | 0.09 (-0.19, 0.37)                            | 0.52 |
| Preference for the same second stage management plan in subsequent delivery, n (%) | 1055 (91.3)                    | 1066 (91.0)                 | 1.00 (0.99, 1.02)                             | 0.62 |

Mean difference (95% CI) for binary outcomes and relative risk (95% CI) for continuous outcomes is obtained from generalized estimating equations models which were used to account for study site.

**eTable 3.** Primary and secondary efficacy outcomes (per protocol)

| Outcome                                                                              | Immediate pushing (N=1111) <sup>[1]</sup> | Delayed pushing (N=970) <sup>[1]</sup> | Absolute Difference (95% CI) | Relative Risk (95% CI) | P      |
|--------------------------------------------------------------------------------------|-------------------------------------------|----------------------------------------|------------------------------|------------------------|--------|
| <b>PRIMARY OUTCOME</b>                                                               |                                           |                                        |                              |                        |        |
| Spontaneous Vaginal Delivery, n (%)                                                  | 961 (86.5)                                | 843 (86.9)                             | -0.4 (-3.3, 2.5)             | 1.00 (0.97, 1.03)      | 0.78   |
| <b>PRESPECIFIED SECONDARY OUTCOMES</b>                                               |                                           |                                        |                              |                        |        |
| <b>MATERNAL</b>                                                                      |                                           |                                        |                              |                        |        |
| Total Duration of Second Stage (min), median (IQR) mean (SD)                         | 73 (43, 126) 97.3(75.3)                   | 122 (93, 178) 144.8(74.1)              | -46.9 (-52.6, -41.3)         |                        | <0.001 |
| Duration of Active Pushing (min) median (IQR) mean (SD), n                           | 57 (29, 111) 81.5(74.4), 1109             | 52 (27, 104) 77.0(71.4), 969           | 4.9 (0.4, 9.4)               |                        | 0.03   |
| From Complete Dilation to Push (min), median (IQR) mean (SD), n                      | 15 (11, 20) 16.0(8.2), 1109               | 67 (62, 74) 67.7(13.7), 969            | -51.7 (-53.2, -50.2)         |                        | <0.001 |
| Operative Vaginal Delivery, n (%)                                                    | 68 (6.1)                                  | 55 (5.7)                               | 0.5 (-1.6, 2.5)              | 1.1 (0.7, 1.7)         | 0.76   |
| Vacuum Assisted Vaginal, n (%)                                                       | 50 (4.5)                                  | 42 (4.3)                               | 0.2 (-1.6, 1.9)              | 1.0 (0.7, 1.5)         | 0.89   |
| Forceps Assisted Vaginal, n (%)                                                      | 18 (1.6)                                  | 13 (1.3)                               | 0.3 (-0.8, 1.3)              | 1.2 (0.6, 2.4)         | 0.59   |
| Cesarean Delivery, n (%)                                                             | 82 (7.4)                                  | 72 (7.4)                               | -0.0 (-2.3, 2.2)             | 1.0 (0.9, 1.1)         | 0.93   |
| Postpartum Hemorrhage, n (%)                                                         | 24 (2.2)                                  | 38 (3.9)                               | -1.8 (-3.3, -0.3)            | 0.6 (0.3, 1.0)         | 0.05   |
| Endometritis, n (%)                                                                  | 6 (0.5)                                   | 3 (0.3)                                | 0.2 (-0.3, 0.8)              | 1.8 (0.4, 7.4)         | 0.43   |
| Chorioamnionitis, n (%)                                                              | 73 (6.6)                                  | 86 (8.9)                               | -2.3 (-4.6, 0.0)             | 0.7 (0.6, 1.0)         | 0.03   |
| Overt Levator Ani Muscle injury (perineal laceration ≥2 <sup>nd</sup> degree), n (%) | 509 (45.8)                                | 459 (47.3)                             | -1.51 (-5.8, 2.8)            | 0.97 (0.93, 1.02)      | 0.21   |
| 2 <sup>nd</sup> , n (%)                                                              | 445 (40.1)                                | 419 (43.2)                             | -3.14 (-7.4, 1.1)            | 0.93 (0.90, 0.98)      | 0.002  |
| 3 <sup>rd</sup> , n (%)                                                              | 59 (5.3)                                  | 38 (3.9)                               | 1.39 (-0.4, 3.2)             | 1.4 (1.1, 1.7)         | 0.01   |
| 4 <sup>th</sup> , n (%)                                                              | 5 (0.5)                                   | 2 (0.2)                                | 0.24 (-0.2, 0.7)             | 2.2 (0.6, 7.6)         | 0.23   |

| Outcome                                                     | Immediate pushing (N=1111) <sup>[1]</sup> | Delayed pushing (N=970) <sup>[1]</sup> | Absolute Difference (95% CI) | Relative Risk (95% CI) | P    |
|-------------------------------------------------------------|-------------------------------------------|----------------------------------------|------------------------------|------------------------|------|
| <b>NEONATAL</b>                                             |                                           |                                        |                              |                        |      |
| Composite Neonatal Morbidity, (%)                           | 78 (7.0)                                  | 76 (7.8)                               | -0.8 (-3.1, 1.5)             | 0.9 (0.7, 1.2)         | 0.52 |
| Neonatal death                                              | 0                                         | 0                                      | -                            | -                      | -    |
| Major birth injury                                          | 6 (0.5)                                   | 1 (0.1)                                | 0.4 (-0.0, 0.9)              | 5.1 (1.6, 16.1)        | 0.01 |
| Acidemia (pH<7.1)                                           | 7 (0.6)                                   | 12 (1.2)                               | -0.6 (-1.4, 0.2)             | 0.6 (0.3, 0.9)         | 0.02 |
| Respiratory distress                                        | 27 (2.4)                                  | 18 (1.9)                               | 0.6 (-0.7, 1.8)              | 1.3 (0.9, 1.9)         | 0.18 |
| Transient tachypnea                                         | 6 (0.5)                                   | 5 (0.5)                                | 0.0 (-0.6, 0.7)              | 1.1 (0.3, 3.8)         | 0.93 |
| Meconium aspiration with pulmonary hypertension             | 0                                         | 2 (0.2)                                | -0.2 (-0.5, 0.1)             | -                      | -    |
| Hypoxic-ischemic encephalopathy                             | 3 (0.3)                                   | 2 (0.2)                                | 0.1 (-0.4, 0.5)              | 1.3 (0.3, 5.7)         | 0.73 |
| Hypoglycemia                                                | 24 (2.2)                                  | 22 (2.3)                               | -0.1 (-1.4, 1.2)             | 1.0 (0.5, 1.9)         | 0.96 |
| Hypothermic treatment (cooling)                             | 1 (0.1)                                   | 0                                      | -0.2 (-0.6, 0.2)             | 0.3 (0.0, 1.9)         | 0.20 |
| Suspected sepsis                                            | 34 (3.1)                                  | 31 (3.2)                               | -0.14 (-1.6, 1.4)            | 1.0 (0.7, 1.3)         | 0.78 |
| <b>OTHER EXPLORATORY SECONDARY OUTCOMES</b>                 |                                           |                                        |                              |                        |      |
| Estimated blood loss (ml), median (IQR) mean (SD), n        | 350 (300, 450) 414.8(246.1), 1077         | 350 (300, 450) 426.1(312.2), 944       | -11.3 (-26.8, 4.2)           |                        | 0.15 |
| Blood transfusion, n (%)                                    | 14 (1.3)                                  | 13 (1.3)                               | -0.1 (-1.1, 0.9)             | 1.0 (0.6, 1.6)         | 0.86 |
| Shoulder dystocia, n (%)                                    | 36 (3.2)                                  | 22 (2.3)                               | 1.0 (-0.4, 2.4)              | 1.4 (1.0, 2.1)         | 0.05 |
| 3 <sup>rd</sup> or 4 <sup>th</sup> degree laceration, n (%) | 64 (5.8)                                  | 40 (4.1)                               | 1.6 (-0.2, 3.5)              | 1.4 (1.1, 1.8)         | 0.01 |
| NICU admission, n (%)                                       | 57 (5.1)                                  | 54 (5.6)                               | -0.4 (-2.4, 1.5)             | 1.0 (0.7, 1.3)         | 0.74 |

SD denotes standard deviation and IQR denotes interquartile range.

[1] N unless otherwise stated. Absolute difference (95% CI) for binary outcomes is calculated from binomial distribution. Relative risk (95% CI) for binary outcomes and absolute difference (95% CI) for continuous outcomes is obtained from generalized estimating equations models which were used to account for study site.



**eTable 4.** Primary and secondary efficacy outcomes (as treated)

| Outcome                                                                              | Immediate pushing (N=1345) <sup>[1]</sup> | Delayed pushing (N=1059) <sup>[1]</sup> | Absolute Difference (95% CI) | Relative Risk (95% CI) | P      |
|--------------------------------------------------------------------------------------|-------------------------------------------|-----------------------------------------|------------------------------|------------------------|--------|
| <b>PRIMARY OUTCOME</b>                                                               |                                           |                                         |                              |                        |        |
| Spontaneous Vaginal Delivery, n (%)                                                  | 1159 (86.2),<br>1344                      | 913 (86.2)                              | 0.0 (-2.8, 2.8)              | 1.00 (0.98, 1.03)      | 0.98   |
| <b>PRESPECIFIED SECONDARY OUTCOMES</b>                                               |                                           |                                         |                              |                        |        |
| <b>MATERNAL</b>                                                                      |                                           |                                         |                              |                        |        |
| Total Duration of Second Stage (min), median (IQR) mean (SD), n                      | 71.5 (43, 125)<br>96.1(74.3),<br>1344     | 123 (92, 181)<br>146.5(77.1)            | -49.5 (-55.4, -43.6)         |                        | <0.001 |
| Duration of Active Pushing (min) median (IQR) mean (SD), n                           | 52 (26, 106.5)<br>78.4(73.4),<br>1340     | 55 (27, 111)<br>79.9(74.7),<br>1058     | -0.5 (-5.4, 4.3)             |                        | 0.83   |
| From Complete Dilation to Push (min), median (IQR) mean (SD), n                      | 16 (11, 22)<br>17.9(11.3),<br>1340        | 67 (61, 74)<br>66.6(16.1),<br>1058      | -48.7 (-50.2, -47.3)         |                        | <0.001 |
| Operative Vaginal Delivery, n (%)                                                    | 84 (6.3), 1344                            | 63 (6.0)                                | 0.3 (-1.6, 2.2)              | 1.0 (0.7, 1.5)         | 0.81   |
| Vacuum Assisted Vaginal, n (%)                                                       | 64 (4.8), 1344                            | 47 (4.4)                                | 0.3 (-1.4, 2.0)              | 1.1 (0.8, 1.5)         | 0.73   |
| Forceps Assisted Vaginal, n (%)                                                      | 20 (1.5), 1344                            | 16 (1.5)                                | -0.0 (-1.0, 1.0)             | 1.0 (0.6, 1.5)         | 0.93   |
| Cesarean Delivery, n (%)                                                             | 101 (7.5), 1344                           | 83 (7.8)                                | -0.3 (-2.5, 1.8)             | 1.0 (0.8, 1.1)         | 0.67   |
| Postpartum Hemorrhage, n (%)                                                         | 34 (2.5)                                  | 41 (3.9)                                | -1.3 (-2.8, 0.1)             | 0.7 (0.4, 1.1)         | 0.11   |
| Endometritis, n (%)                                                                  | 7 (0.5)                                   | 4 (0.4)                                 | 0.1 (-0.4, 0.7)              | 1.4 (0.5, 4.0)         | 0.52   |
| Chorioamnionitis, n (%)                                                              | 97 (7.2)                                  | 93 (8.8)                                | -1.6 (-3.8, 0.6)             | 0.8 (0.6, 1.1)         | 0.19   |
| Overt Levator Ani Muscle injury (perineal laceration ≥2 <sup>nd</sup> degree), n (%) | 608 (45.2)                                | 501 (47.3)                              | -2.1 (-6.1, 1.9)             | 0.97 (0.93, 1.00)      | 0.05   |
| 2 <sup>nd</sup> , n (%)                                                              | 529 (39.3)                                | 457 (43.2)                              | -3.8 (-7.8, 0.1)             | 0.92 (0.88, 0.96)      | <0.001 |
| 3 <sup>rd</sup> , n (%)                                                              | 73 (5.4)                                  | 42 (4.0)                                | 1.5 (-0.2, 3.2)              | 1.4 (1.1, 1.8)         | 0.02   |
| 4 <sup>th</sup> , n (%)                                                              | 6 (0.5)                                   | 2 (0.2)                                 | 0.3 (-0.2, 0.7)              | 2.4 (0.6, 9.5)         | 0.22   |

| Outcome                                                     | Immediate pushing<br>(N=1345) <sup>[1]</sup> | Delayed pushing<br>(N=1059) <sup>[1]</sup> | Absolute Difference<br>(95% CI) | Relative Risk<br>(95% CI) | P    |
|-------------------------------------------------------------|----------------------------------------------|--------------------------------------------|---------------------------------|---------------------------|------|
| <b>NEONATAL</b>                                             |                                              |                                            |                                 |                           |      |
| Composite Neonatal Morbidity, (%)                           | 109 (8.1), 1345                              | 85 (8.0)                                   | 0.1 (-2.1, 2.3)                 | 1.0 (0.8, 1.3)            | 0.80 |
| Neonatal death                                              | 0, 1345                                      | 0                                          | -                               | -                         | -    |
| Major birth injury                                          | 8 (0.6), 1345                                | 1 (0.1)                                    | 0.5 (0.1, 1.0)                  | 6.1 (1.6, 22.9)           | 0.01 |
| Acidemia (pH<7.1)                                           | 9 (0.7), 1345                                | 14 (1.3)                                   | -0.7 (-1.5, 0.2)                | 0.6 (0.3, 1.0)            | 0.06 |
| Respiratory distress                                        | 34 (2.5), 1345                               | 21 (2.0)                                   | 0.5 (-0.6, 1.7)                 | 1.3 (0.9, 1.8)            | 0.20 |
| Transient tachypnea                                         | 10 (0.7), 1345                               | 7 (0.7)                                    | 0.1 (-0.6, 0.8)                 | 1.1 (0.4, 3.5)            | 0.83 |
| Meconium aspiration with pulmonary hypertension             | 0, 1345                                      | 2 (0.2)                                    | -0.2 (-0.5, 0.1)                | -                         | -    |
| Hypoxic-ischemic encephalopathy                             | 3 (0.2), 1345                                | 2 (0.2)                                    | 0.0 (-0.3, 0.4)                 | 1.2 (0.3, 5.2)            | 0.85 |
| Hypoglycemia                                                | 28 (2.1)                                     | 26 (2.5)                                   | -0.4 (-1.6, 0.8)                | 0.9 (0.5, 1.6)            | 0.70 |
| Hypothermic treatment (cooling)                             | 1 (0.1)                                      | 3 (0.3)                                    | -0.2 (-0.6, 0.1)                | 0.3 (0.0, 1.8)            | 0.17 |
| Suspected sepsis                                            | 56 (4.2)                                     | 35 (3.3)                                   | 0.9 (-0.7, 2.4)                 | 1.3 (0.9, 1.8)            | 0.18 |
| <b>OTHER EXPLORATORY SECONDARY OUTCOMES</b>                 |                                              |                                            |                                 |                           |      |
| Estimated blood loss (ml),<br>median (IQR)<br>mean (SD), n  | 350 (300, 450)<br>415.2(243.7),<br>1307      | 350 (300, 450)<br>429.9(313.1),<br>1030    | -14.8 (-26.2, -3.3)             |                           | 0.01 |
| Blood transfusion, n (%)                                    | 16 (1.2)                                     | 13 (1.2)                                   | -0.0 (-0.9, 0.8)                | 1.0 (0.6, 1.5)            | 0.99 |
| Shoulder dystocia, n (%)                                    | 41 (3.1)                                     | 26 (2.5)                                   | 0.6 (-0.7, 1.9)                 | 1.3 (1.0, 1.6)            | 0.06 |
| 3 <sup>rd</sup> or 4 <sup>th</sup> degree laceration, n (%) | 79 (5.9)                                     | 44 (4.2)                                   | 1.7 (-0.0, 3.5)                 | 1.4 (1.1, 1.9)            | 0.01 |
| NICU admission, n (%)                                       | 81 (6.0)                                     | 60 (5.7)                                   | 0.4 (-1.5, 2.3)                 | 1.1 (0.9, 1.3)            | 0.39 |

SD denotes standard deviation and IQR denotes interquartile range

[1] N unless otherwise stated. Absolute difference (95% CI) for binary outcomes is calculated from binomial distribution. Relative risk (95% CI) for binary outcome and absolute difference (95% CI) for continuous outcomes is obtained from generalized estimating equations models which were used to account for study site.
