# Supplementary material
Source: PubMed Central journal article supplement (PMC6583005)
Supplement: jama-320-1444-s004.pdf [file jama-320-1444-s004.pdf]

## Data Sharing Statement

Cahill AG, Srinivas SK, Tita ATN, et al. Effect of Immediate vs Delayed Pushing on Rates of Spontaneous Vaginal Delivery Among Nulliparous Women Receiving Neuraxial Analgesia: A Randomized Clinical Trial. *JAMA*. Published October 9, 2018. doi:10.1001/jama.2018.13986

### Data

**Data available:** Yes

**Data types:** Deidentified participant data

**How to access data:** cahilla@wustl.edu

**When available:** beginning date: 01-01-2023

### Supporting Documents

**Document types:** None

### Additional Information

**Who can access the data:** researcher with a proposed use approved

**Types of analyses:** scientific purpose

**Mechanisms of data availability:** after approval of a proposal
